# Supplementary material
Source: PubMed Central journal article supplement (PMC2535816)
Supplement: NIHMS62959-supplement-1si20060109_05.pdf [file NIHMS62959-supplement-1si20060109_05.pdf]

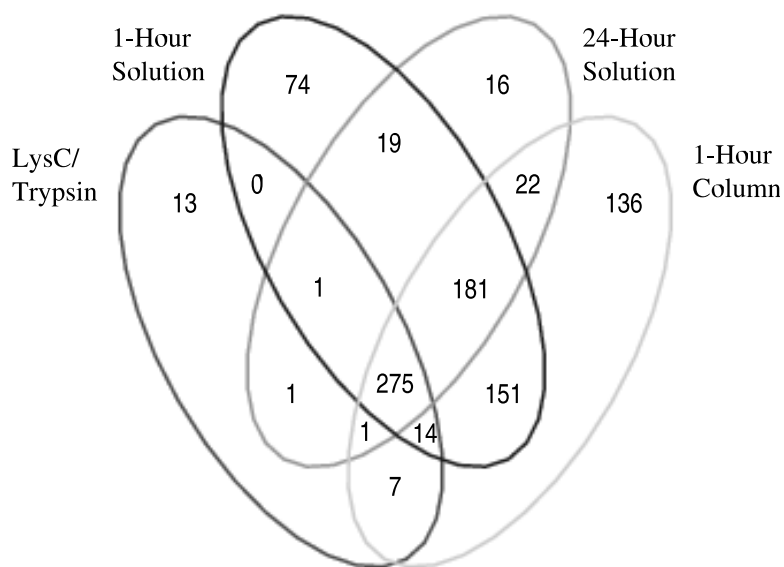

Figure 1: Overlap of protein identifications for four different digestion protocols.

Table 1: Overlap of protein identifications for four different digestion protocols.

| Condition          | No overlap | Lys-C | Column | Column and Lys-C |
|--------------------|------------|-------|--------|------------------|
| No overlap         | —          | 13    | 136    | 7                |
| 1-H Soln.          | 74         | 0     | 151    | 14               |
| 24-H Soln.         | 16         | 1     | 22     | 1                |
| 1-H and 24-H Soln. | 19         | 1     | 181    | 275              |

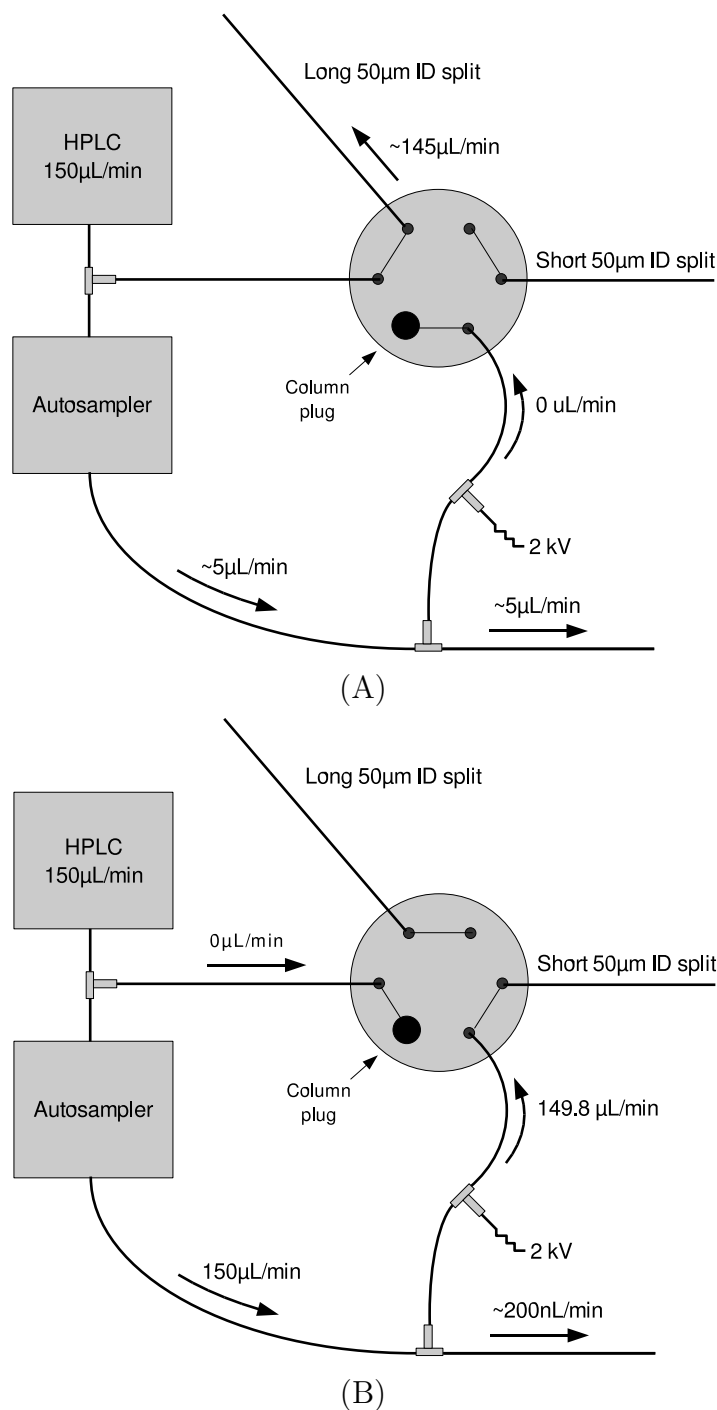

Figure 2: A unique autosampler configuration that comprises two distinct states: a sample loading configuration (A) and a sample running configuration (B). In both, the HPLC pump flows at  $150\mu\text{L}/\text{min}$ , and flow rate to the electro spray tip is reduced through the use of a microcapillary split. The main difference between the two states is the position and length of this split. In the loading configuration (A), a relatively long split occurs between the HPLC pump and the autosampler, avoiding sample loss, while maintained output flow rate at  $5\mu\text{L}/\text{min}$  (diverting  $145\mu\text{L}/\text{min}$  to waste). In the running configuration (B), a relatively short split occurs after the autosampler, allowing further reduction in flow rate to  $200\text{nL}/\text{min}$  (diverting  $149.8\mu\text{L}/\text{min}$  to waste). This configuration allows rapid sample loading while allowing running at the nanoliter flow rate necessary for electro spray.

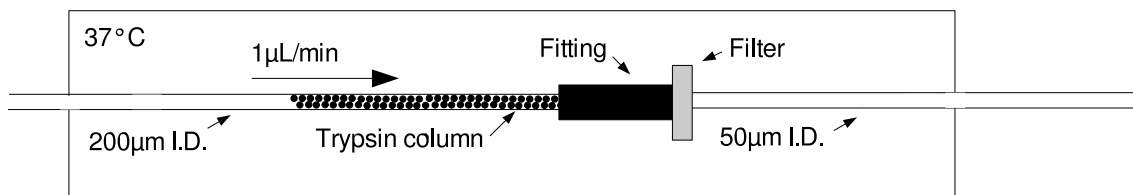

Figure 3: Immobilized-trypsin column. A reduced, alkylated and unfractionated protein mixture is pumped at  $1\mu\text{L}/\text{min}$  into a  $200\mu\text{m}$  ID microcapillary tube containing 7cm of immobilized trypsin beads. The beads are kept in place using a fitting and filter and held at a constant temperature of  $37^\circ\text{C}$  using a column heater. Sample exits the column at  $1\mu\text{L}/\text{min}$  through a  $50\mu\text{m}$  I.D. microcappillary tube and is then subjected to mass spectrometric analysis.

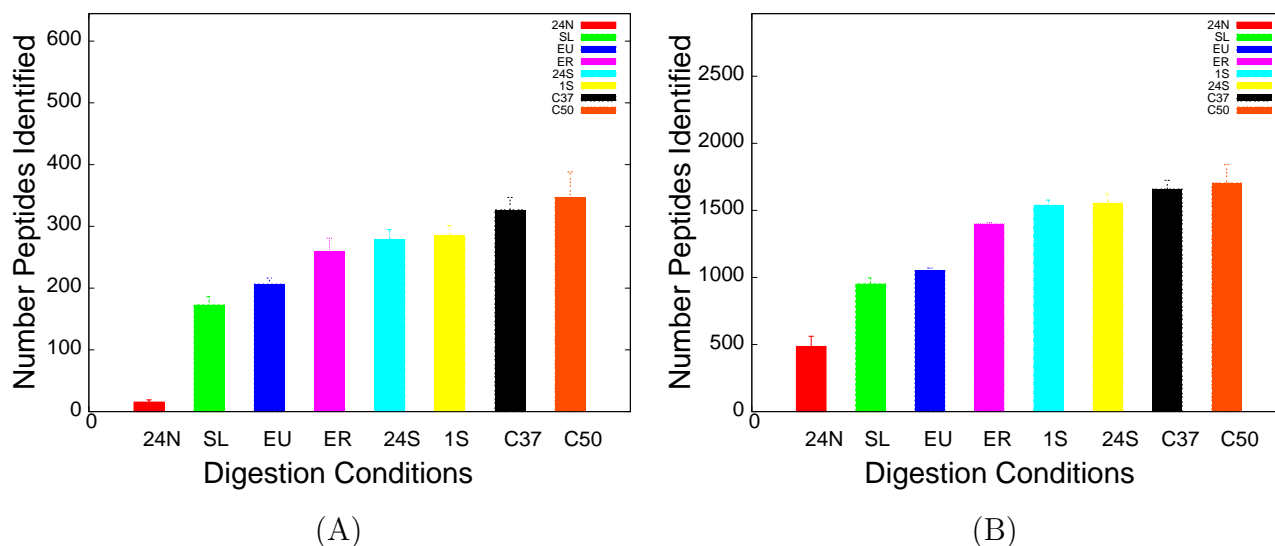

Figure 4: Number of true positive peptide identifications for several digestion conditions, including additional controls. Peptide samples were produced as described in the text with additional controls as noted below. Spectra were analyzed as described in the text, constraining peptides to have either tryptic-specificity only (A) or no specificity whatsoever (B). Digestion conditions are as follows: a 24-Hour-Null control (24N) identical to the 24-Hour-Solution digestion except without trypsin enzyme; a slurry control (SL) identical to the 1-Hour-Solution digestion except with a volume of trypsin bead slurry equal to that used in the 1-Hour-Column digestion trypsin column; the Lys-C/Tryp digestion (EU); a Lys-C/Tryp digestion with 50mM Rapigest instead of 8M urea (ER), but otherwise identical to EU; the 24-Hour-Solution digestion (24S); the 1-Hour-Solution digestion (1S); the 1-Hour-Column digestion (C37); finally, a 1-Hour-Column digestion at 50C instead of 37C (C50);

Table 2: Distributions of proteins identified with a given number of spectra for four different digestion conditions. The first value in each cell is the mean across four samples; the second is the standard deviation.

| Peptide Count <sup>1</sup> | Lys-C        | 24-H Sol       | 1-H Col        | 1-H Sol       |
|----------------------------|--------------|----------------|----------------|---------------|
| 1                          | 89.25 ± 7.80 | 144.00 ± 16.10 | 161.00 ± 12.68 | 185.50 ± 3.87 |
| 2                          | 40.25 ± 6.65 | 64.00 ± 9.20   | 80.50 ± 12.97  | 78.75 ± 2.63  |
| 3                          | 23.00 ± 2.71 | 36.25 ± 6.29   | 51.00 ± 8.76   | 52.25 ± 4.57  |
| 4                          | 13.75 ± 3.50 | 28.25 ± 7.41   | 46.00 ± 8.64   | 39.50 ± 1.29  |
| 5                          | 8.00 ± 2.45  | 19.00 ± 4.55   | 30.25 ± 3.59   | 24.75 ± 1.26  |
| 6                          | 7.25 ± 1.50  | 12.75 ± 2.22   | 23.25 ± 4.92   | 14.50 ± 1.73  |
| 7                          | 4.50 ± 1.29  | 11.50 ± 3.32   | 21.25 ± 9.54   | 14.25 ± 6.08  |
| 8                          | 4.25 ± 2.50  | 10.25 ± 3.20   | 15.50 ± 4.51   | 12.50 ± 2.89  |
| 9                          | 2.25 ± 0.50  | 8.25 ± 0.96    | 13.00 ± 2.71   | 14.50 ± 1.73  |
| 10                         | 1.25 ± 1.50  | 4.00 ± 0.82    | 14.75 ± 0.96   | 7.50 ± 2.38   |
| 11                         | 2.00 ± 1.83  | 5.00 ± 2.83    | 9.75 ± 2.87    | 9.25 ± 3.20   |
| 12                         | 0.75 ± 0.96  | 5.00 ± 1.41    | 10.00 ± 3.16   | 7.25 ± 2.50   |
| 13                         | 0.50 ± 0.58  | 3.75 ± 2.36    | 8.75 ± 2.22    | 4.75 ± 1.71   |
| 14                         | 0.75 ± 0.50  | 3.75 ± 1.71    | 8.25 ± 1.71    | 4.75 ± 2.36   |
| 15                         | 0.50 ± 0.58  | 2.00 ± 0.82    | 6.50 ± 3.70    | 4.75 ± 3.20   |
| 16                         | 0.00 ± 0.00  | 1.75 ± 0.50    | 6.50 ± 3.42    | 4.50 ± 1.00   |
| 17                         | 0.00 ± 0.00  | 0.75 ± 0.50    | 6.25 ± 3.20    | 5.00 ± 2.58   |
| 18                         | 0.00 ± 0.00  | 0.25 ± 0.50    | 6.00 ± 2.94    | 4.00 ± 2.45   |
| 19                         | 0.50 ± 1.00  | 0.50 ± 0.58    | 6.00 ± 1.83    | 3.25 ± 2.50   |
| 20                         | 0.00 ± 0.00  | 0.75 ± 0.96    | 4.00 ± 1.41    | 3.25 ± 1.26   |
| 21-25                      | 0.25 ± 0.50  | 1.75 ± 0.50    | 18.00 ± 4.97   | 7.25 ± 2.22   |
| 26-30                      | 0.50 ± 0.58  | 0.25 ± 0.50    | 13.00 ± 2.16   | 4.50 ± 0.58   |
| 31-35                      | 1.00 ± 0.82  | 0.50 ± 0.58    | 9.25 ± 2.22    | 1.75 ± 0.96   |
| 36-40                      | 0.75 ± 0.96  | 0.50 ± 1.00    | 2.50 ± 3.11    | 1.25 ± 0.50   |
| 41-45                      | 1.00 ± 0.82  | 0.50 ± 0.58    | 2.25 ± 2.63    | 0.25 ± 0.50   |
| 46-50                      | 1.25 ± 0.96  | 2.00 ± 1.15    | 2.00 ± 1.15    | 0.50 ± 0.58   |
| 51-60                      | 0.25 ± 0.50  | 1.50 ± 1.29    | 2.50 ± 0.58    | 1.00 ± 0.82   |
| 61-70                      | 0.50 ± 0.58  | 1.75 ± 1.26    | 2.25 ± 0.50    | 1.75 ± 1.26   |
| 71-80                      | 0.25 ± 0.50  | 0.75 ± 0.50    | 2.25 ± 0.50    | 1.75 ± 0.96   |
| 81-90                      | 0.75 ± 0.50  | 0.00 ± 0.00    | 0.50 ± 0.58    | 2.25 ± 0.50   |
| 91-100                     | 0.00 ± 0.00  | 0.75 ± 0.50    | 0.50 ± 1.00    | 0.75 ± 0.96   |
| 101-200                    | 0.00 ± 0.00  | 0.00 ± 0.00    | 5.50 ± 0.58    | 1.25 ± 0.50   |
| 201-300                    | 0.00 ± 0.00  | 0.00 ± 0.00    | 1.00 ± 0.00    | 0.00 ± 0.00   |

<sup>1</sup>See text for detailed description of digestion conditions.
